# Supplementary material
Source: Copernicus journal article supplement (doi:10.5194/bg-23-2583-2026)
Supplement: Supplementary file 1 [file bg-23-2583-2026-supplement.pdf]

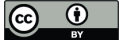

*Supplement of*

## **Warmer growing seasons improve cereal yields in Northern Europe only with increasing precipitation**

**Faranak Tootoonchi et al.**

*Correspondence to:* Faranak Tootoonchi ([faranak.tootoonchi@slu.se](mailto:faranak.tootoonchi@slu.se))

The copyright of individual parts of the supplement might differ from the article licence.

## Supplementary information

### Equations showing both fixed and random effects

The MatLab code corresponds to the three models examining yield dependence on both fixed and random effects, facilitating reproducibility. The first model used the composite precipitation-temperature indicator, the dryness index, as the explanatory variable (Eq. S1). The second model quantified the effects of interacting conditions, either averaged over the entire period or extending over substantial intervals, such as dry spells (Eq. S2). The third model focused on short-term non-interacting damaging conditions (Eq. S3).

$$y \sim t + DI + DI^2 + (1|Year) + (1|ID) \quad \text{eq. S1}$$

$$y \sim t + X_P + X_T + X_P^2 + X_T^2 + X_P * X_T + X_P^2 * X_T + X_P * X_T^2 + X_P^2 * X_T^2 + (1|Year) + (1|ID) \quad \text{eq. S2}$$

$$y \sim t + NDP1 + NDP20 + NDT25 + Frost + NDP1^2 + NDP20^2 + NDT25^2 + Frost^2 + (1|Year) + (1|ID) \quad \text{eq. S3}$$

### Tables

Table S1 Model coefficient estimates, standard errors (SE) and p values for the winter wheat indicators according to eqs. 1-3 for interacting, short term and composite indicators over separate periods. Significant effects at  $p \leq 0.05$  are highlighted in bold. The  $r2marg$  and  $r2cond$  represent the fraction of explained variance when considering only marginal effects and when also considering the random effects, respectively. Over the post-flowering period there was no incident of Frost.

| Period                                              | Pre-growing<br>(3 months prior to the main<br>growing season) |       |                 | Entire growing season                                                                     |       |                 | Pre-flowering |       |                 | Post-flowering |       |                 |
|-----------------------------------------------------|---------------------------------------------------------------|-------|-----------------|-------------------------------------------------------------------------------------------|-------|-----------------|---------------|-------|-----------------|----------------|-------|-----------------|
| <i>Used indicators</i>                              | (1) DI                                                        |       |                 | (2) Psum (denoted as x_P) and Tmean (denoted as x_T)                                      |       |                 |               |       |                 |                |       |                 |
| <b>Model Structure</b>                              | $\beta_0 + \beta_t t + \beta_{DI}(DI) + \beta_{DI2}(DI)^2$    |       |                 | $\beta_0 + \beta_t t + \beta_P x_P + \beta_T x_T + \beta_{P2} x_P^2 + \beta_{PT} x_P x_T$ |       |                 |               |       |                 |                |       |                 |
| Name                                                | Estimate                                                      | SE    | p               | Estimate                                                                                  | SE    | p               | Estimate      | SE    | p               | Estimate       | SE    | p               |
| $\beta_0$ [ton·ha <sup>-1</sup> ]                   | 3.147                                                         | 0.285 | <b>2.73E-13</b> | 10.432                                                                                    | 1.253 | <b>4.78E-14</b> | 4.294         | 0.584 | <b>3.97E-09</b> | 7.333          | 1.101 | <b>3.61E-09</b> |
| $\beta_t$ [ton·ha <sup>-1</sup> ·yr <sup>-1</sup> ] | 0.050                                                         | 0.005 | <b>2.46E-22</b> | 0.054                                                                                     | 0.004 | <b>3.93E-31</b> | 0.052         | 0.005 | <b>8.21E-26</b> | 0.051          | 0.005 | <b>1.70E-25</b> |
| $\beta_{DI}$ [ton·ha <sup>-1</sup> ]                | 0.884                                                         | 0.298 | <b>3.09E-03</b> |                                                                                           |       |                 |               |       |                 |                |       |                 |
| $\beta_{DI2}$ [ton·ha <sup>-1</sup> ]               | -0.351                                                        | 0.109 | <b>1.29E-03</b> |                                                                                           |       |                 |               |       |                 |                |       |                 |
| <i>AIC</i>                                          | 1450                                                          |       |                 |                                                                                           |       |                 |               |       |                 |                |       |                 |
| <i>r2marg</i>                                       | 0.44                                                          |       |                 |                                                                                           |       |                 |               |       |                 |                |       |                 |
| <i>r2cond</i>                                       | 0.85                                                          |       |                 |                                                                                           |       |                 |               |       |                 |                |       |                 |

|                                                                             |                                                            |       |                 |        |       |                 |        |       |                 |
|-----------------------------------------------------------------------------|------------------------------------------------------------|-------|-----------------|--------|-------|-----------------|--------|-------|-----------------|
| $\beta_P$ [ton·ha <sup>-1</sup> ·cm <sup>-1</sup> ]                         | -0.330                                                     | 0.074 | <b>1.04E-05</b> | 0.01   | 0.115 | 9.33E-01        | -0.273 | 0.087 | <b>1.75E-03</b> |
| $\beta_T$ [ton·ha <sup>-1</sup> ·°C <sup>-1</sup> ]                         | -0.568                                                     | 0.088 | <b>1.67E-10</b> | -0.099 | 0.047 | <b>3.45E-02</b> | -0.271 | 0.067 | <b>6.33E-05</b> |
| $\beta_{PT}$<br>[ton·ha <sup>-1</sup> ·cm <sup>-1</sup> ·°C <sup>-1</sup> ] | 0.032                                                      | 0.005 | <b>1.39E-10</b> | 0.012  | 0.009 | 1.60E-01        | 0.024  | 0.005 | <b>4.51E-06</b> |
| $\beta_{P2}$<br>[ton·ha <sup>-1</sup> ·cm <sup>-2</sup> ]                   | -0.003                                                     | 0.001 | <b>4.97E-09</b> | -0.010 | 0.004 | <b>9.81E-03</b> | -0.004 | 0.001 | <b>6.52E-06</b> |
| <i>AIC</i>                                                                  | 1394                                                       |       |                 | 1458   |       |                 | 1428   |       |                 |
| <i>r2marg</i>                                                               | 0.50                                                       |       |                 | 0.45   |       |                 | 0.46   |       |                 |
| <i>r2cond</i>                                                               | 0.87                                                       |       |                 | 0.85   |       |                 | 0.86   |       |                 |
| <i>Used indicators</i>                                                      | (3) Pvar (denoted as x_P) and Tvar (denoted as x_T)        |       |                 |        |       |                 |        |       |                 |
| <i>Model Structure</i>                                                      | $\beta_0 + \beta_t t + \beta_P x_P + \beta_T x_T$          |       |                 |        |       |                 |        |       |                 |
| $\beta_0$ [ton·ha <sup>-1</sup> ]                                           | 3.457                                                      | 0.269 | <b>5.58E-17</b> | 3.495  | 0.234 | <b>2.26E-21</b> | 3.701  | 0.245 | <b>1.36E-22</b> |
| $\beta_t$ [ton·ha <sup>-1</sup> ·yr <sup>-1</sup> ]                         | 0.051                                                      | 0.005 | <b>5.65E-23</b> | 0.05   | 0.005 | <b>1.88E-23</b> | 0.051  | 0.005 | <b>6.10E-23</b> |
| $\beta_P$<br>[ton·ha <sup>-1</sup> ·mm <sup>-2</sup> ·day <sup>-2</sup> ]   | -0.001                                                     | 0.003 | 6.86E-01        | 0.011  | 0.004 | <b>3.88E-03</b> | -0.002 | 0.002 | <b>2.98E-01</b> |
| $\beta_T$<br>[ton·ha <sup>-1</sup> ·°C <sup>-2</sup> ·day <sup>-2</sup> ]   | 0.011                                                      | 0.01  | 2.63E-01        | 0.003  | 0.007 | 6.45E-01        | -0.01  | 0.012 | 4.30E-01        |
| <i>AIC</i>                                                                  | 1471                                                       |       |                 | 1464   |       |                 | 1470   |       |                 |
| <i>r2marg</i>                                                               | 0.44                                                       |       |                 | 0.44   |       |                 | 0.44   |       |                 |
| <i>r2cond</i>                                                               | 0.85                                                       |       |                 | 0.85   |       |                 | 0.85   |       |                 |
| <i>Used indicators</i>                                                      | (4) CDD (denoted as x_P) and Tmean (denoted as x_T)        |       |                 |        |       |                 |        |       |                 |
| <i>Model Structure</i>                                                      | $\beta_0 + \beta_t t + \beta_P x_P + \beta_T x_T$          |       |                 |        |       |                 |        |       |                 |
| $\beta_0$ [ton·ha <sup>-1</sup> ]                                           | 5.585                                                      | 0.735 | <b>8.98E-11</b> | 4.613  | 0.415 | <b>2.12E-19</b> | 3.927  | 0.717 | <b>1.07E-05</b> |
| $\beta_t$ [ton·ha <sup>-1</sup> ·yr <sup>-1</sup> ]                         | 0.050                                                      | 0.005 | <b>1.07E-25</b> | 0.052  | 0.005 | <b>1.11E-25</b> | 0.048  | 0.005 | <b>1.78E-21</b> |
| $\beta_P$ [ton·ha <sup>-1</sup> ·day <sup>-1</sup> ]                        | -0.032                                                     | 0.004 | <b>2.84E-12</b> | -0.018 | 0.007 | <b>5.67E-03</b> | -0.037 | 0.005 | <b>2.36E-11</b> |
| $\beta_T$ [ton·ha <sup>-1</sup> ·°C <sup>-1</sup> ]                         | -0.114                                                     | 0.054 | <b>3.58E-02</b> | -0.078 | 0.033 | <b>1.96E-02</b> | 0.007  | 0.047 | 8.78E-01        |
| <i>AIC</i>                                                                  | 1409                                                       |       |                 | 1452   |       |                 | 1420   |       |                 |
| <i>r2marg</i>                                                               | 0.47                                                       |       |                 | 0.45   |       |                 | 0.46   |       |                 |
| <i>r2cond</i>                                                               | 0.86                                                       |       |                 | 0.85   |       |                 | 0.86   |       |                 |
| <i>Used indicators</i>                                                      | (5) DI                                                     |       |                 |        |       |                 |        |       |                 |
| <i>Model Structure</i>                                                      | $\beta_0 + \beta_t t + \beta_{DI}(DI) + \beta_{DI2}(DI)^2$ |       |                 |        |       |                 |        |       |                 |
| $\beta_0$ [ton·ha <sup>-1</sup> ]                                           | 3.432                                                      | 0.279 | <b>5.72E-32</b> | 2.911  | 0.266 | <b>5.09E-26</b> | 3.188  | 0.286 | <b>7.80E-27</b> |
| $\beta_t$ [ton·ha <sup>-1</sup> ·yr <sup>-1</sup> ]                         | 0.049                                                      | 0.005 | <b>9.71E-26</b> | 0.051  | 0.005 | <b>1.28E-25</b> | 0.049  | 0.005 | <b>1.05E-22</b> |
| $\beta_{DI}$ [ton·ha <sup>-1</sup> ]                                        | -0.189                                                     | 0.033 | <b>1.45E-08</b> | -0.018 | 0.004 | <b>3.95E-05</b> | -0.085 | 0.029 | <b>3.66E-03</b> |

|                                                               |                                                                                                                                                                                                                               |       |                 |        |       |                 |        |       |                 |
|---------------------------------------------------------------|-------------------------------------------------------------------------------------------------------------------------------------------------------------------------------------------------------------------------------|-------|-----------------|--------|-------|-----------------|--------|-------|-----------------|
| $\beta_{DI2}$ [ton·ha <sup>-1</sup> ]                         | 0.004                                                                                                                                                                                                                         | 0.001 | <b>3.81E-03</b> | 0.001  | 0     | <b>4.57E-04</b> | 0.001  | 0.001 | 4.87E-01        |
| <i>AIC</i>                                                    | 1430                                                                                                                                                                                                                          |       |                 | 1468   |       |                 | 1442   |       |                 |
| <i>r2marg</i>                                                 | 0.47                                                                                                                                                                                                                          |       |                 | 0.44   |       |                 | 0.45   |       |                 |
| <i>r2cond</i>                                                 | 0.86                                                                                                                                                                                                                          |       |                 | 0.85   |       |                 | 0.86   |       |                 |
| <b>Used indicators</b>                                        | (6) Short-term indicators                                                                                                                                                                                                     |       |                 |        |       |                 |        |       |                 |
| <b>Model Structure</b>                                        | $\beta_0 + \beta_t t + \beta_{NDP1}(NDP1) + \beta_{NDT25}(NDT25) + \beta_{NDP20}(NDP20) + \beta_{Frost}(Frost) + \beta_{NDP1\_2}(NDP1)^2 + \beta_{NDT25\_2}(NDT25)^2 + \beta_{NDP20\_2}(NDP20)^2 + \beta_{Frost\_2}(Frost)^2$ |       |                 |        |       |                 |        |       |                 |
| $\beta_0$ [ton·ha <sup>-1</sup> ]                             | 1.156                                                                                                                                                                                                                         | 0.411 | <b>5.08E-03</b> | 2.342  | 0.297 | <b>1.12E-14</b> | 1.88   | 0.352 | <b>1.25E-07</b> |
| $\beta_t$ [ton·ha <sup>-1</sup> ·yr <sup>-1</sup> ]           | 0.051                                                                                                                                                                                                                         | 0.005 | <b>5.94E-27</b> | 0.051  | 0.005 | <b>2.75E-25</b> | 0.049  | 0.005 | <b>5.10E-24</b> |
| $\beta_{NDP20}$ [ton·ha <sup>-1</sup> ·day <sup>-1</sup> ]    | 0.013                                                                                                                                                                                                                         | 0.046 | 7.86E-01        | 0.168  | 0.236 | 4.76E-01        | -0.024 | 0.051 | 6.42E-01        |
| $\beta_{NDP1}$ [ton·ha <sup>-1</sup> ·day <sup>-1</sup> ]     | 0.120                                                                                                                                                                                                                         | 0.021 | <b>1.56E-08</b> | 0.081  | 0.025 | <b>1.28E-03</b> | 0.123  | 0.022 | <b>4.73E-08</b> |
| $\beta_{NDT25}$ [ton·ha <sup>-1</sup> ·day <sup>-1</sup> ]    | -0.009                                                                                                                                                                                                                        | 0.015 | 5.45E-01        | 0.016  | 0.032 | 6.19E-01        | -0.01  | 0.018 | 5.92E-01        |
| $\beta_{Frost}$ [ton·ha <sup>-1</sup> ·day <sup>-1</sup> ]    | 0.036                                                                                                                                                                                                                         | 0.03  | 2.27E-01        | 0.042  | 0.03  | 1.58E-01        | -      | -     | -               |
| $\beta_{NDP20\_2}$ [ton·ha <sup>-1</sup> ·day <sup>-2</sup> ] | -0.008                                                                                                                                                                                                                        | 0.013 | 5.52E-01        | -0.052 | 0.176 | 7.68E-01        | -0.006 | 0.015 | 6.84E-01        |
| $\beta_{NDP1\_2}$ [ton·ha <sup>-1</sup> ·day <sup>-2</sup> ]  | -0.002                                                                                                                                                                                                                        | 0     | <b>6.10E-08</b> | -0.003 | 0.001 | <b>9.99E-03</b> | -0.003 | 0.001 | <b>1.41E-08</b> |
| $\beta_{NDT25\_2}$ [ton·ha <sup>-1</sup> ·day <sup>-2</sup> ] | 0                                                                                                                                                                                                                             | 0.001 | 9.36E-01        | -0.003 | 0.004 | 3.73E-01        | 0      | 0.001 | 9.11E-01        |
| $\beta_{Frost\_2}$ [ton·ha <sup>-1</sup> ·day <sup>-2</sup> ] | -0.002                                                                                                                                                                                                                        | 0.004 | 5.40E-01        | -0.002 | 0.004 | 5.30E-01        | -      | -     | -               |
| <i>AIC</i>                                                    | 1499                                                                                                                                                                                                                          |       |                 | 1504   |       |                 | 1478   |       |                 |
| <i>r2marg</i>                                                 | 0.46                                                                                                                                                                                                                          |       |                 | 0.44   |       |                 | 0.45   |       |                 |
| <i>r2cond</i>                                                 | 0.85                                                                                                                                                                                                                          |       |                 | 0.85   |       |                 | 0.85   |       |                 |

20 Table S2 Same as above but for spring barley.

| Period                                              | Pre-growing<br>(3 months prior to the main<br>growing season) |       |                 |
|-----------------------------------------------------|---------------------------------------------------------------|-------|-----------------|
| <b>Used indicators</b>                              | (1) DI                                                        |       |                 |
| <b>Model Structure</b>                              | $\beta_0 + \beta_t t + \beta_{DI}(DI) + \beta_{DI2}(DI)^2$    |       |                 |
| Name                                                | Estimate                                                      | SE    | p               |
| $\beta_0$ [ton·ha <sup>-1</sup> ]                   | 2.149                                                         | 0.214 | <b>7.67E-23</b> |
| $\beta_t$ [ton·ha <sup>-1</sup> ·yr <sup>-1</sup> ] | 0.025                                                         | 0.003 | <b>1.26E-17</b> |
| $\beta_{DI}$ [ton·ha <sup>-1</sup> ]                | 0.195                                                         | 0.055 | <b>4.68E-04</b> |
| $\beta_{DI2}$ [ton·ha <sup>-1</sup> ]               | -0.014                                                        | 0.004 | <b>2.69E-03</b> |
| <i>AIC</i>                                          | 1756                                                          |       |                 |
| <i>r2marg</i>                                       | 0.18                                                          |       |                 |
| <i>r2cond</i>                                       | 0.80                                                          |       |                 |
| Period                                              | Entire growing season                                         |       | Post-flowering  |
| <b>Used indicators</b>                              | (2) Psum (denoted as x_P) and Tmean (denoted as x_T)          |       |                 |

| <b>Model Structure</b>                                                       | $\beta_0 + \beta_t t + \beta_P x_P + \beta_T x_T + \beta_{PT} x_P x_T + \beta_{P^2} x_P^2$                                                                                                                                    |       |                 |          |       |                 |          |       |                 |
|------------------------------------------------------------------------------|-------------------------------------------------------------------------------------------------------------------------------------------------------------------------------------------------------------------------------|-------|-----------------|----------|-------|-----------------|----------|-------|-----------------|
| Name                                                                         | Estimate                                                                                                                                                                                                                      | SE    | p               | Estimate | SE    | p               | Estimate | SE    | p               |
| $\beta_0$ [ton·ha <sup>-1</sup> ]                                            | 9.138                                                                                                                                                                                                                         | 0.765 | <b>4.3E-31</b>  | 3.601    | 0.681 | <b>1.45E-07</b> | 3.807    | 0.425 | <b>1.39E-18</b> |
| $\beta_t$ [ton·ha <sup>-1</sup> ·yr <sup>-1</sup> ]                          | 0.028                                                                                                                                                                                                                         | 0.002 | <b>1.3E-28</b>  | 0.026    | 0.003 | <b>6.47E-20</b> | 0.027    | 0.003 | <b>1.62E-20</b> |
| $\beta_P$ [ton·ha <sup>-1</sup> ·cm <sup>-1</sup> ]                          | -0.259                                                                                                                                                                                                                        | 0.034 | <b>3.03E-14</b> | -0.042   | 0.050 | 4.03E-01        | -0.044   | 0.035 | 2.07E-01        |
| $\beta_T$ [ton·ha <sup>-1</sup> ·°C <sup>-1</sup> ]                          | -0.530                                                                                                                                                                                                                        | 0.050 | <b>1.46E-25</b> | -0.147   | 0.048 | <b>2.30E-03</b> | -0.103   | 0.022 | <b>2.62E-06</b> |
| $\beta_{PT}$<br>[ton·ha <sup>-1</sup> ·cm <sup>-1</sup> ·°C <sup>-1</sup> ]  | 0.022                                                                                                                                                                                                                         | 0.002 | <b>2.58E-27</b> | 0.012    | 0.003 | <b>4.65E-04</b> | 0.004    | 0.002 | <b>3.01E-02</b> |
| $\beta_{P^2}$<br>[ton·ha <sup>-1</sup> ·cm <sup>-2</sup> ]                   | -0.001                                                                                                                                                                                                                        | 0.000 | <b>1.32E-05</b> | -0.004   | 0.000 | <b>1.29E-15</b> | -0.001   | 0.001 | 2.38E-01        |
| AIC                                                                          | 1598                                                                                                                                                                                                                          |       |                 | 1671     |       |                 | 1766     |       |                 |
| r2marg                                                                       | 0.24                                                                                                                                                                                                                          |       |                 | 0.20     |       |                 | 0.20     |       |                 |
| r2cond                                                                       | 0.82                                                                                                                                                                                                                          |       |                 | 0.81     |       |                 | 0.80     |       |                 |
| <b>Used indicators</b>                                                       | (3) Pvar (denoted as x_P) and Tvar (denoted as x_T)                                                                                                                                                                           |       |                 |          |       |                 |          |       |                 |
| <b>Model Structure</b>                                                       | $\beta_0 + \beta_t t + \beta_P x_P + \beta_T x_T$                                                                                                                                                                             |       |                 |          |       |                 |          |       |                 |
| $\beta_0$ [ton·ha <sup>-1</sup> ]                                            | 2.617                                                                                                                                                                                                                         | 0.225 | <b>1.30E-29</b> | 2.600    | 0.217 | <b>3.27E-31</b> | 2.280    | 0.213 | <b>1.62E-25</b> |
| $\beta_t$ [ton·ha <sup>-1</sup> ·yr <sup>-1</sup> ]                          | 0.025                                                                                                                                                                                                                         | 0.003 | <b>3.97E-17</b> | 0.025    | 0.003 | <b>5.33E-16</b> | 0.025    | 0.003 | <b>1.26E-16</b> |
| $\beta_P$<br>[ton·ha <sup>-1</sup> ·mm <sup>-2</sup> ·day <sup>2</sup> ]     | -0.005                                                                                                                                                                                                                        | 0.002 | <b>1.12E-02</b> | -0.005   | 0.002 | <b>2.15E-02</b> | -0.001   | 0.001 | 3.71E-01        |
| $\beta_T$<br>[ton·ha <sup>-1</sup> ·°C <sup>-2</sup> ·day <sup>2</sup> ]     | -0.015                                                                                                                                                                                                                        | 0.006 | <b>5.96E-03</b> | -0.015   | 0.004 | <b>2.29E-04</b> | 0.010    | 0.006 | 1.01E-01        |
| AIC                                                                          | 1760                                                                                                                                                                                                                          |       |                 | 1755     |       |                 | 1770     |       |                 |
| r2marg                                                                       | 0.18                                                                                                                                                                                                                          |       |                 | 0.18     |       |                 | 0.18     |       |                 |
| r2cond                                                                       | 0.80                                                                                                                                                                                                                          |       |                 | 0.80     |       |                 | 0.80     |       |                 |
| <b>Used indicators</b>                                                       | (4) CDD (denoted as P) and Tmean (denoted as T)                                                                                                                                                                               |       |                 |          |       |                 |          |       |                 |
| <b>Model Structure</b>                                                       | $\beta_0 + \beta_t t + \beta_P x_P + \beta_T x_T + \beta_{PT} x_P x_T + \beta_{T^2} x_T^2$                                                                                                                                    |       |                 |          |       |                 |          |       |                 |
| $\beta_0$ [ton·ha <sup>-1</sup> ]                                            | -8.056                                                                                                                                                                                                                        | 1.632 | <b>9.16E-07</b> | -1.106   | 1.815 | 5.43E-01        | 1.512    | 0.733 | <b>3.92E-02</b> |
| $\beta_t$ [ton·ha <sup>-1</sup> ·yr <sup>-1</sup> ]                          | 0.027                                                                                                                                                                                                                         | 0.002 | <b>8.81E-28</b> | 0.024    | 0.003 | <b>1.65E-19</b> | 0.028    | 0.003 | <b>5.26E-22</b> |
| $\beta_P$ [ton·ha <sup>-1</sup> ·day <sup>-1</sup> ]                         | 0.226                                                                                                                                                                                                                         | 0.031 | <b>3.72E-13</b> | 0.165    | 0.032 | <b>3.30E-07</b> | 0.094    | 0.025 | <b>1.35E-04</b> |
| $\beta_T$ [ton·ha <sup>-1</sup> ·°C <sup>-1</sup> ]                          | 1.317                                                                                                                                                                                                                         | 0.238 | <b>3.85E-08</b> | 0.373    | 0.279 | 1.82E-01        | 0.119    | 0.089 | 1.82E-01        |
| $\beta_{PT}$<br>[ton·ha <sup>-1</sup> ·day <sup>-1</sup> ·°C <sup>-1</sup> ] | -0.017                                                                                                                                                                                                                        | 0.002 | <b>2.12E-15</b> | -0.014   | 0.002 | <b>3.34E-09</b> | -0.006   | 0.001 | <b>1.55E-04</b> |
| $\beta_{T^2}$<br>[ton·ha <sup>-1</sup> ·°C <sup>-2</sup> ]                   | -0.040                                                                                                                                                                                                                        | 0.009 | <b>8.41E-06</b> | -0.006   | 0.011 | 5.67E-01        | -0.005   | 0.003 | 1.05E-01        |
| AIC                                                                          | 1603                                                                                                                                                                                                                          |       |                 | 1696     |       |                 | 1750     |       |                 |
| r2marg                                                                       | 0.24                                                                                                                                                                                                                          |       |                 | 0.21     |       |                 | 0.21     |       |                 |
| r2cond                                                                       | 0.82                                                                                                                                                                                                                          |       |                 | 0.81     |       |                 | 0.80     |       |                 |
| <b>Used indicators</b>                                                       | (5) DI                                                                                                                                                                                                                        |       |                 |          |       |                 |          |       |                 |
| <b>Model Structure</b>                                                       | $\beta_0 + \beta_t t + \beta_{DI}(DI) + \beta_{DI^2}(DI)^2$                                                                                                                                                                   |       |                 |          |       |                 |          |       |                 |
| $\beta_0$ [ton·ha <sup>-1</sup> ]                                            | 2.123                                                                                                                                                                                                                         | 0.228 | <b>6.70E-20</b> | 2.468    | 0.208 | <b>7.90E-31</b> | 2.328    | 0.206 | <b>3.83E-28</b> |
| $\beta_t$ [ton·ha <sup>-1</sup> ·yr <sup>-1</sup> ]                          | 0.025                                                                                                                                                                                                                         | 0.003 | <b>2.06E-20</b> | 0.025    | 0.003 | <b>1.13E-18</b> | 0.025    | 0.003 | <b>1.32E-16</b> |
| $\beta_{DI}$ [ton·ha <sup>-1</sup> ]                                         | 0.171                                                                                                                                                                                                                         | 0.056 | <b>2.18E-03</b> | -0.028   | 0.020 | 1.65E-01        | -0.001   | 0.001 | 5.14E-02        |
| $\beta_{DI^2}$ [ton·ha <sup>-1</sup> ]                                       | -0.031                                                                                                                                                                                                                        | 0.006 | <b>4.91E-07</b> | -0.001   | 0.001 | 1.56E-01        | 0.000    | 0.000 | <b>1.94E-02</b> |
| AIC                                                                          | 1720                                                                                                                                                                                                                          |       |                 | 1740     |       |                 | 1790     |       |                 |
| r2marg                                                                       | 0.19                                                                                                                                                                                                                          |       |                 | 0.18     |       |                 | 0.18     |       |                 |
| r2cond                                                                       | 0.80                                                                                                                                                                                                                          |       |                 | 0.80     |       |                 | 0.80     |       |                 |
| <b>Used indicators</b>                                                       | (6) Short-term indicators                                                                                                                                                                                                     |       |                 |          |       |                 |          |       |                 |
| <b>Model Structure</b>                                                       | $\beta_0 + \beta_t t + \beta_{NDP1}(NDP1) + \beta_{NDT25}(NDT25) + \beta_{NDP20}(NDP20) + \beta_{Frost}(Frost) + \beta_{NDP1\_2}(NDP1)^2 + \beta_{NDT25\_2}(NDT25)^2 + \beta_{NDP20\_2}(NDP20)^2 + \beta_{Frost\_2}(Frost)^2$ |       |                 |          |       |                 |          |       |                 |

|                                                               |        |       |                 |        |       |                 |        |       |                 |
|---------------------------------------------------------------|--------|-------|-----------------|--------|-------|-----------------|--------|-------|-----------------|
| $\beta_0$ [ton·ha <sup>-1</sup> ]                             | 0.820  | 0.308 | <b>7.99E-03</b> | 1.120  | 0.246 | <b>6.00E-06</b> | 2.166  | 0.237 | <b>2.49E-19</b> |
| $\beta_t$ [ton·ha <sup>-1</sup> ·yr <sup>-1</sup> ]           | 0.028  | 0.002 | <b>7.05E-31</b> | 0.026  | 0.003 | <b>1.30E-23</b> | 0.027  | 0.003 | <b>7.43E-22</b> |
| $\beta_{NDP20}$ [ton·ha <sup>-1</sup> ·day <sup>-1</sup> ]    | -0.033 | 0.029 | 2.51E-01        | 0.044  | 0.043 | 2.98E-01        | -0.050 | 0.051 | 3.22E-01        |
| $\beta_{NDP1}$ [ton·ha <sup>-1</sup> ·day <sup>-1</sup> ]     | 0.083  | 0.011 | <b>5.74E-13</b> | 0.112  | 0.012 | <b>3.20E-19</b> | 0.030  | 0.014 | <b>3.24E-02</b> |
| $\beta_{NDT25}$ [ton·ha <sup>-1</sup> ·day <sup>-1</sup> ]    | -0.005 | 0.006 | 4.21E-01        | -0.013 | 0.010 | 1.94E-01        | -0.007 | 0.009 | 4.14E-01        |
| $\beta_{Frost}$ [ton·ha <sup>-1</sup> ·day <sup>-1</sup> ]    | 0.007  | 0.015 | 6.34E-01        | 0.012  | 0.015 | 4.43E-01        | -      | -     | -               |
| $\beta_{NDP20\_2}$ [ton·ha <sup>-1</sup> ·day <sup>-2</sup> ] | -0.003 | 0.008 | 7.28E-01        | -0.035 | 0.015 | <b>2.47E-02</b> | 0.014  | 0.024 | 5.46E-01        |
| $\beta_{NDP1\_2}$ [ton·ha <sup>-1</sup> ·day <sup>-2</sup> ]  | -0.001 | 0.000 | <b>3.77E-14</b> | -0.002 | 0.000 | <b>2.78E-21</b> | -0.001 | 0.000 | <b>1.98E-02</b> |
| $\beta_{NDT25\_2}$ [ton·ha <sup>-1</sup> ·day <sup>-2</sup> ] | 0.000  | 0.000 | <b>3.94E-03</b> | 0.000  | 0.001 | 8.18E-01        | -0.001 | 0.000 | <b>3.25E-02</b> |
| $\beta_{Frost\_2}$ [ton·ha <sup>-1</sup> ·day <sup>-2</sup> ] | 0.000  | 0.002 | 8.76E-01        | 0.000  | 0.002 | 8.49E-01        |        |       |                 |
| <i>AIC</i>                                                    | 1719   |       |                 | 1728   |       |                 | 1770   |       |                 |
| <i>r2marg</i>                                                 | 0.23   |       |                 | 0.21   |       |                 | 0.20   |       |                 |
| <i>r2cond</i>                                                 | 0.81   |       |                 | 0.81   |       |                 | 0.80   |       |                 |

Table S3 Same as above but for spring wheat

| Period                                                                   | Pre-growing<br>(2 months prior to the main growing season)                 |       |                  |               |      |                  |                |       |                  |
|--------------------------------------------------------------------------|----------------------------------------------------------------------------|-------|------------------|---------------|------|------------------|----------------|-------|------------------|
| <i>Used indicators</i>                                                   | (1) DI                                                                     |       |                  |               |      |                  |                |       |                  |
| <b>Model Structure</b>                                                   | $\beta_0 + \beta_t t + \beta_{DI}(DI) + \beta_{DI2}(DI)^2$                 |       |                  |               |      |                  |                |       |                  |
| Name                                                                     | Estimate                                                                   | SE    | p                |               |      |                  |                |       |                  |
| $\beta_0$ [ton·ha <sup>-1</sup> ]                                        | 2.747                                                                      | 0.228 | <b>9.28E-18</b>  |               |      |                  |                |       |                  |
| $\beta_t$ [ton·ha <sup>-1</sup> ·yr <sup>-1</sup> ]                      | 0.028                                                                      | 0.004 | <b>9.24E-11</b>  |               |      |                  |                |       |                  |
| $\beta_{DI}$ [ton·ha <sup>-1</sup> ]                                     | 0.414                                                                      | 0.145 | <b>4.49E-03</b>  |               |      |                  |                |       |                  |
| $\beta_{DI2}$ [ton·ha <sup>-1</sup> ]                                    | -0.075                                                                     | 0.032 | <b>1.91E-02</b>  |               |      |                  |                |       |                  |
| <i>AIC</i>                                                               | 1030                                                                       |       |                  |               |      |                  |                |       |                  |
| <i>r2marg</i>                                                            | 0.32                                                                       |       |                  |               |      |                  |                |       |                  |
| <i>r2cond</i>                                                            | 0.80                                                                       |       |                  |               |      |                  |                |       |                  |
| Period                                                                   | Entire growing season                                                      |       |                  | Pre-flowering |      |                  | Post-flowering |       |                  |
| <b>Used indicators</b>                                                   | (2) Psum (denoted as x_P) and Tmean (denoted as x_T)                       |       |                  |               |      |                  |                |       |                  |
| <b>Model Structure [unit]</b>                                            | $\beta_0 + \beta_t t + \beta_{Px\_P} + \beta_{Tx\_T} + \beta_{PTx\_Px\_T}$ |       |                  |               |      |                  |                |       |                  |
| Name                                                                     | Estimate                                                                   | SE    | p                | Estimate      | SE   | p                | Estimate       | SE    | p                |
| $\beta_0$ [ton·ha <sup>-1</sup> ]                                        | 9.868                                                                      | 1.320 | <b>4.385E-12</b> | 5.329         | 0.82 | <b>5.202E-09</b> | 7.252          | 1.027 | <b>8.782E-11</b> |
| $\beta_t$ [ton·ha <sup>-1</sup> ·yr <sup>-1</sup> ]                      | 0.040                                                                      | 0.004 | <b>4.178E-17</b> | 0.031         | 0.00 | <b>3.079E-12</b> | 0.033          | 0.004 | <b>3.737E-15</b> |
| $\beta_P$ [ton·ha <sup>-1</sup> ·cm <sup>-1</sup> ]                      | -0.253                                                                     | 0.060 | <b>5.876E-06</b> | -0.251        | 0.08 | <b>1.128E-03</b> | -0.211         | 0.065 | <b>1.300E-03</b> |
| $\beta_T$ [ton·ha <sup>-1</sup> ·°C <sup>-1</sup> ]                      | -0.471                                                                     | 0.092 | <b>4.420E-07</b> | -0.182        | 0.07 | <b>5.992E-03</b> | -0.252         | 0.061 | <b>4.516E-05</b> |
| $\beta_{PT}$ [ton·ha <sup>-1</sup> ·cm <sup>-1</sup> ·°C <sup>-1</sup> ] | 0.020                                                                      | 0.003 | <b>9.612E-06</b> | 0.020         | 0.01 | <b>1.476E-03</b> | 0.012          | 0.004 | <b>1.985E-03</b> |
| <i>AIC</i>                                                               | 1031                                                                       |       |                  | 1042          |      |                  | 1039           |       |                  |
| <i>r2marg</i>                                                            | 0.34                                                                       |       |                  | 0.32          |      |                  | 0.35           |       |                  |
| <i>r2cond</i>                                                            | 0.80                                                                       |       |                  | 0.81          |      |                  | 0.81           |       |                  |

|                                                                           |                                                                                                                                                                                                                                       |       |                  |             |       |                  |             |       |                  |
|---------------------------------------------------------------------------|---------------------------------------------------------------------------------------------------------------------------------------------------------------------------------------------------------------------------------------|-------|------------------|-------------|-------|------------------|-------------|-------|------------------|
| <b>Used indicators</b>                                                    | (3) Pvar (denoted as x_P) and Tvar (denoted as x_T)                                                                                                                                                                                   |       |                  |             |       |                  |             |       |                  |
| <b>Model Structure</b>                                                    | $\beta_0 + \beta_t t + \beta_P x_P + \beta_T x_T$                                                                                                                                                                                     |       |                  |             |       |                  |             |       |                  |
| $\beta_0$ [ton·ha <sup>-1</sup> ]                                         | 3.515                                                                                                                                                                                                                                 | 0.247 | <b>7.014E-25</b> | 3.333       | 0.218 | <b>6.456E-26</b> | 2.585       | 0.257 | <b>3.176E-22</b> |
| $\beta_t$ [ton·ha <sup>-1</sup> ·yr <sup>-1</sup> ]                       | 0.030                                                                                                                                                                                                                                 | 0.004 | <b>1.915E-11</b> | 0.030       | 0.004 | <b>5.921E-11</b> | 0.030       | 0.004 | <b>2.341E-11</b> |
| $\beta_P$ [ton·ha <sup>-1</sup> ·mm <sup>-2</sup> ·day <sup>2</sup> ]     | -0.005                                                                                                                                                                                                                                | 0.003 | 9.491E-02        | -0.005      | 0.004 | 1.700E-01        | -0.001      | 0.002 | 4.099E-01        |
| $\beta_T$ [ton·ha <sup>-1</sup> ·°C <sup>-2</sup> ·day <sup>2</sup> ]     | -0.023                                                                                                                                                                                                                                | 0.009 | <b>1.006E-02</b> | -0.012      | 0.006 | <b>4.098E-02</b> | 0.015       | 0.015 | 3.122E-01        |
| AIC                                                                       | 1040                                                                                                                                                                                                                                  |       |                  | 1042        |       |                  | 1046        |       |                  |
| r2marg                                                                    | 0.32                                                                                                                                                                                                                                  |       |                  | 0.31        |       |                  | 0.31        |       |                  |
| r2cond                                                                    | 0.81                                                                                                                                                                                                                                  |       |                  | 0.81        |       |                  | 0.80        |       |                  |
| <b>Used indicators</b>                                                    | (4) CDD (denoted as x_P) and Tmean (denoted as x_T)                                                                                                                                                                                   |       |                  |             |       |                  |             |       |                  |
| <b>Model Structure</b>                                                    | $\beta_0 + \beta_t t + \beta_P x_P + \beta_T x_T + \beta_{T2} x_T^2 + \beta_{PT} x_P x_T$                                                                                                                                             |       |                  |             |       |                  |             |       |                  |
| $\beta_0$ [ton·ha <sup>-1</sup> ]                                         | -12.394                                                                                                                                                                                                                               | 4.354 | <b>3.186E-03</b> | -6.36       | 2.73  | <b>1.228E-02</b> | -4.60       | 3.71  | 2.153E-01        |
| $\beta_t$ [ton·ha <sup>-1</sup> ·yr <sup>-1</sup> ]                       | 0.033                                                                                                                                                                                                                                 | 0.003 | <b>9.375E-17</b> | 0.032       | 0.00  | <b>8.009E-15</b> | 0.03        | 0.00  | <b>5.826E-15</b> |
| $\beta_P$ [ton·ha <sup>-1</sup> ·day <sup>-1</sup> ]                      | 0.130                                                                                                                                                                                                                                 | 0.054 | <b>1.847E-02</b> | 0.145       | 0.04  | <b>7.625E-04</b> | 0.14        | 0.08  | 8.009E-02        |
| $\beta_T$ [ton·ha <sup>-1</sup> ·°C <sup>-1</sup> ]                       | 2.116                                                                                                                                                                                                                                 | 0.612 | <b>5.808E-04</b> | 1.415       | 0.44  | <b>1.387E-03</b> | 0.87        | 0.46  | 6.086E-02        |
| $\beta_{PT}$ [ton·ha <sup>-1</sup> ·day <sup>-1</sup> ·°C <sup>-1</sup> ] | -0.009                                                                                                                                                                                                                                | 0.003 | <b>1.012E-02</b> | -0.012      | 0.00  | <b>3.256E-04</b> | -0.01       | 0.00  | 7.022E-02        |
| $\beta_{T2}$ [ton·ha <sup>-1</sup> ·°C <sup>-2</sup> ]                    | -0.071                                                                                                                                                                                                                                | 0.021 | <b>1.014E-03</b> | -0.051      | 0.02  | <b>4.222E-03</b> | -0.03       | 0.01  | 7.021E-02        |
| AIC                                                                       | 1029                                                                                                                                                                                                                                  |       |                  | 1038        |       |                  | 1045        |       |                  |
| r2marg                                                                    | <b>0.38</b>                                                                                                                                                                                                                           |       |                  | <b>0.36</b> |       |                  | <b>0.35</b> |       |                  |
| r2cond                                                                    | <b>0.81</b>                                                                                                                                                                                                                           |       |                  | <b>0.81</b> |       |                  | <b>0.81</b> |       |                  |
| <b>Used indicators</b>                                                    | (5) DI                                                                                                                                                                                                                                |       |                  |             |       |                  |             |       |                  |
| <b>Model Structure</b>                                                    | $\beta_0 + \beta_t t + \beta_{DI} (DI) + \beta_{DI2} (DI)^2$                                                                                                                                                                          |       |                  |             |       |                  |             |       |                  |
| $\beta_0$ [ton·ha <sup>-1</sup> ]                                         | 2.64                                                                                                                                                                                                                                  | 0.28  | <b>2.59E-19</b>  | 2.71        | 0.26  | <b>3.94E-24</b>  | 2.70        | 0.25  | <b>3.39E-25</b>  |
| $\beta_t$ [ton·ha <sup>-1</sup> ·yr <sup>-1</sup> ]                       | 0.03                                                                                                                                                                                                                                  | 0.00  | <b>3.14E-13</b>  | 0.03        | 0.00  | <b>7.28E-12</b>  | 0.03        | 0.00  | <b>3.96E-12</b>  |
| $\beta_{DI}$ [ton·ha <sup>-1</sup> ]                                      | 0.04                                                                                                                                                                                                                                  | 0.07  | 5.84E-01         | -0.01       | 0.03  | 6.70E-01         | -0.01       | 0.03  | 8.68E-01         |
| $\beta_{DI2}$ [ton·ha <sup>-1</sup> ]                                     | -0.01                                                                                                                                                                                                                                 | 0.01  | 8.39E-02         | 0.00        | 0.00  | 7.64E-01         | 0.00        | 0.00  | 2.92E-01         |
| AIC                                                                       | 1034                                                                                                                                                                                                                                  |       |                  | 1047        |       |                  | 1042        |       |                  |
| r2marg                                                                    | 0.32                                                                                                                                                                                                                                  |       |                  | 0.31        |       |                  | 0.31        |       |                  |
| r2cond                                                                    | 0.80                                                                                                                                                                                                                                  |       |                  | 0.80        |       |                  | 0.80        |       |                  |
| <b>Used indicators</b>                                                    | (6) Short-term indicators                                                                                                                                                                                                             |       |                  |             |       |                  |             |       |                  |
| <b>Model Structure</b>                                                    | $\beta_0 + \beta_t t + \beta_{NDP1} (NDP1) + \beta_{NDT25} (NDT25) + \beta_{NDP20} (NDP20) + \beta_{Frost} (Frost) + \beta_{NDP1\_2} (NDP1)^2 + \beta_{NDT25\_2} (NDT25)^2 + \beta_{NDP20\_2} (NDP20)^2 + \beta_{Frost\_2} (Frost)^2$ |       |                  |             |       |                  |             |       |                  |
| $\beta_0$ [ton·ha <sup>-1</sup> ]                                         | 1.995                                                                                                                                                                                                                                 | 0.466 | <b>2.18E-05</b>  | 2.547       | 0.307 | <b>6.91E-16</b>  | 2.189       | 0.339 | <b>2.14E-10</b>  |
| $\beta_t$ [ton·ha <sup>-1</sup> ·yr <sup>-1</sup> ]                       | 0.033                                                                                                                                                                                                                                 | 0.004 | <b>1.10E-16</b>  | 0.031       | 0.004 | <b>2.73E-13</b>  | 0.031       | 0.004 | <b>3.83E-14</b>  |
| $\beta_{NDP20}$ [ton·ha <sup>-1</sup> ·day <sup>-1</sup> ]                | -0.065                                                                                                                                                                                                                                | 0.042 | 1.22E-01         | -0.023      | 0.094 | 8.06E-01         | -0.083      | 0.046 | <b>7.30E-02</b>  |
| $\beta_{NDP1}$ [ton·ha <sup>-1</sup> ·day <sup>-1</sup> ]                 | 0.052                                                                                                                                                                                                                                 | 0.021 | <b>1.29E-02</b>  | 0.033       | 0.022 | 1.44E-01         | 0.053       | 0.022 | <b>1.78E-02</b>  |
| $\beta_{NDT25}$ [ton·ha <sup>-1</sup> ·day <sup>-1</sup> ]                | -0.013                                                                                                                                                                                                                                | 0.010 | 1.97E-01         | -0.012      | 0.020 | 5.48E-01         | -0.004      | 0.013 | 7.51E-01         |
| $\beta_{Frost}$ [ton·ha <sup>-1</sup> ·day <sup>-1</sup> ]                | -0.020                                                                                                                                                                                                                                | 0.024 | 3.95E-01         | -0.016      | 0.024 | 5.00E-01         | -           | -     | -                |
| $\beta_{NDP20\_2}$ [ton·ha <sup>-1</sup> ·day <sup>-2</sup> ]             | 0.009                                                                                                                                                                                                                                 | 0.011 | 4.13E-01         | -0.016      | 0.050 | 7.50E-01         | 0.018       | 0.013 | 1.80E-01         |
| $\beta_{NDP1\_2}$ [ton·ha <sup>-1</sup> ·day <sup>-2</sup> ]              | -0.001                                                                                                                                                                                                                                | 0.000 | <b>5.09E-03</b>  | -0.001      | 0.001 | 5.84E-02         | -0.001      | 0.001 | <b>1.52E-02</b>  |
| $\beta_{NDT25\_2}$ [ton·ha <sup>-1</sup> ·day <sup>-2</sup> ]             | 0.000                                                                                                                                                                                                                                 | 0.000 | 3.50E-01         | -0.001      | 0.001 | 3.09E-01         | 0.000       | 0.000 | 3.17E-01         |

|                                                               |       |       |          |       |       |          |      |   |   |
|---------------------------------------------------------------|-------|-------|----------|-------|-------|----------|------|---|---|
| $\beta_{Frost\_2}$ [ton·ha <sup>-1</sup> ·day <sup>-2</sup> ] | 0.001 | 0.003 | 8.18E-01 | 0.001 | 0.003 | 7.44E-01 | -    | - | - |
| <i>AIC</i>                                                    | 1091  |       |          | 1093  |       |          | 1076 |   |   |
| <i>r2marg</i>                                                 | 0.35  |       |          | 0.30  |       |          | 0.34 |   |   |
| <i>r2cond</i>                                                 | 0.80  |       |          | 0.80  |       |          | 0.80 |   |   |

Table S4 Same as above but for oats

| Period                                                                   | Pre-growing<br>(3 months prior to the main<br>growing season)                             |       |                 |               |       |                 |                |       |                 |
|--------------------------------------------------------------------------|-------------------------------------------------------------------------------------------|-------|-----------------|---------------|-------|-----------------|----------------|-------|-----------------|
| <i>Used indicators</i>                                                   | (1) DI                                                                                    |       |                 |               |       |                 |                |       |                 |
| <i>Model Structure</i>                                                   | $\beta_0 + \beta_t t + \beta_{DI}(DI) + \beta_{DI2}(DI)^2$                                |       |                 |               |       |                 |                |       |                 |
| Name                                                                     | Estimate                                                                                  | SE    | p               |               |       |                 |                |       |                 |
| $\beta_0$ [ton·ha <sup>-1</sup> ]                                        | 2.764                                                                                     | 0.184 | <b>1.36E-26</b> |               |       |                 |                |       |                 |
| $\beta_t$ [ton·ha <sup>-1</sup> ·yr <sup>-1</sup> ]                      | 0.021                                                                                     | 0.004 | <b>2.55E-07</b> |               |       |                 |                |       |                 |
| $\beta_{DI}$ [ton·ha <sup>-1</sup> ]                                     | -0.053                                                                                    | 0.065 | 4.11E-01        |               |       |                 |                |       |                 |
| $\beta_{DI2}$ [ton·ha <sup>-1</sup> ]                                    | 0.001                                                                                     | 0.005 | 7.72E-01        |               |       |                 |                |       |                 |
| <i>AIC</i>                                                               | <b>1580</b>                                                                               |       |                 |               |       |                 |                |       |                 |
| <i>r2marg</i>                                                            | <b>0.15</b>                                                                               |       |                 |               |       |                 |                |       |                 |
| <i>r2cond</i>                                                            | <b>0.75</b>                                                                               |       |                 |               |       |                 |                |       |                 |
| Period                                                                   | Entire growing season                                                                     |       |                 | Pre-flowering |       |                 | Post-flowering |       |                 |
| <i>Used indicators</i>                                                   | (2) Psum (denoted as x_P) and Tmean (denoted as x_T)                                      |       |                 |               |       |                 |                |       |                 |
| <i>Model Structure</i>                                                   | $\beta_0 + \beta_t t + \beta_P x_P + \beta_T x_T + \beta_{PT} x_P x_T + \beta_{T2} x_T^2$ |       |                 |               |       |                 |                |       |                 |
| Name                                                                     | Estimate                                                                                  | SE    | p               | Estimate      | SE    | p               | Estimate       | SE    | p               |
| $\beta_0$ [ton·ha <sup>-1</sup> ]                                        | -3.551                                                                                    | 3.585 | 2.75E-01        | 7.926         | 2.014 | <b>1.68E-04</b> | -3.657         | 2.185 | <b>6.49E-02</b> |
| $\beta_t$ [ton·ha <sup>-1</sup> ·yr <sup>-1</sup> ]                      | 0.024                                                                                     | 0.003 | <b>1.59E-13</b> | 0.020         | 0.004 | <b>1.86E-06</b> | 0.025          | 0.003 | <b>3.88E-16</b> |
| $\beta_P$ [ton·ha <sup>-1</sup> ·cm <sup>-1</sup> ]                      | -0.183                                                                                    | 0.042 | <b>1.62E-05</b> | -0.130        | 0.054 | <b>1.78E-02</b> | -0.149         | 0.048 | <b>1.13E-03</b> |
| $\beta_T$ [ton·ha <sup>-1</sup> ·°C <sup>-1</sup> ]                      | 1.246                                                                                     | 0.490 | <b>1.12E-02</b> | -0.796        | 0.314 | <b>1.08E-02</b> | 1.034          | 0.258 | <b>6.46E-05</b> |
| $\beta_{PT}$ [ton·ha <sup>-1</sup> ·cm <sup>-1</sup> ·°C <sup>-1</sup> ] | 0.013                                                                                     | 0.003 | <b>1.37E-05</b> | 0.010         | 0.004 | <b>2.25E-02</b> | 0.009          | 0.003 | <b>1.26E-03</b> |
| $\beta_{T2}$                                                             | -0.057                                                                                    | 0.016 | <b>6.77E-04</b> | 0.030         | 0.012 | <b>1.32E-02</b> | -0.039         | 0.007 | <b>2.56E-07</b> |
| <i>AIC</i>                                                               | 1546                                                                                      |       |                 | 1591          |       |                 | 1516           |       |                 |
| <i>r2marg</i>                                                            | 0.22                                                                                      |       |                 | 0.15          |       |                 | 0.26           |       |                 |
| <i>r2cond</i>                                                            | 0.76                                                                                      |       |                 | 0.76          |       |                 | 0.76           |       |                 |
| <i>Used indicators</i>                                                   | (3) Pvar (denoted as P) and Tvar (denoted as T)                                           |       |                 |               |       |                 |                |       |                 |
| <i>Model Structure</i>                                                   | $\beta_0 + \beta_t t + \beta_P P + \beta_T T$                                             |       |                 |               |       |                 |                |       |                 |
| $\beta_0$ [ton·ha <sup>-1</sup> ]                                        | 3.194                                                                                     | 0.205 | <b>9.19E-32</b> | 2.804         | 0.187 | <b>5.39E-27</b> | 2.718          | 0.182 | <b>2.08E-26</b> |
| $\beta_t$ [ton·ha <sup>-1</sup> ·yr <sup>-1</sup> ]                      | 0.0198                                                                                    | 0.003 | <b>1.91E-07</b> | 0.020         | 0.004 | <b>3.47E-07</b> | 0.020          | 0.004 | <b>1.70E-07</b> |
| $\beta_P$ [ton·ha <sup>-1</sup> ·mm <sup>-2</sup> ·day <sup>2</sup> ]    | 0.00                                                                                      | 0.002 | 6.94E-01        | 0.00          | 0.003 | 9.77E-01        | 0.00           | 0.001 | 5.62E-01        |
| $\beta_T$ [ton·ha <sup>-1</sup> ·°C <sup>-2</sup> ·day <sup>2</sup> ]    | -0.030                                                                                    | 0.006 | <b>5.94E-07</b> | -0.01         | 0.004 | 1.24E-01        | -0.003         | 0.009 | 6.83E-01        |
| <i>AIC</i>                                                               | 1562                                                                                      |       |                 | 1585          |       |                 | 1586           |       |                 |
| <i>r2marg</i>                                                            | 0.17                                                                                      |       |                 | 0.15          |       |                 | 0.15           |       |                 |
| <i>r2cond</i>                                                            | 0.76                                                                                      |       |                 | 0.75          |       |                 | 0.75           |       |                 |
| <i>Used indicators</i>                                                   | (4) CDD (denoted as P) and Tmean (denoted as T)                                           |       |                 |               |       |                 |                |       |                 |
| <i>Model Structure</i>                                                   | $\beta_0 + \beta_t t + \beta_P x_P + \beta_T x_T + \beta_{T2} x_T^2 + \beta_{PT} x_P x_T$ |       |                 |               |       |                 |                |       |                 |

|                                                                              |                                                                                                                                                                                                                                  |       |                 |        |       |                 |        |       |                 |
|------------------------------------------------------------------------------|----------------------------------------------------------------------------------------------------------------------------------------------------------------------------------------------------------------------------------|-------|-----------------|--------|-------|-----------------|--------|-------|-----------------|
| $\beta_0$ [ton·ha <sup>-1</sup> ]                                            | -9.544                                                                                                                                                                                                                           | 2.905 | <b>6.90E-04</b> | 4.170  | 1.75  | <b>2.81E-02</b> | -5.991 | 2.003 | <b>1.50E-03</b> |
| $\beta_t$ [ton·ha <sup>-1</sup> ·yr <sup>-1</sup> ]                          | 0.023                                                                                                                                                                                                                            | 0.002 | <b>1.63E-15</b> | 0.019  | 0.00  | <b>2.70E-07</b> | 0.026  | 0.003 | <b>1.07E-16</b> |
| $\beta_P$ [ton·ha <sup>-1</sup> ·day <sup>-1</sup> ]                         | 0.134                                                                                                                                                                                                                            | 0.036 | <b>2.41E-04</b> | 0.095  | 0.03  | <b>2.34E-03</b> | 0.066  | 0.041 | 1.15E-01        |
| $\beta_T$ [ton·ha <sup>-1</sup> ·°C <sup>-1</sup> ]                          | 1.741                                                                                                                                                                                                                            | 0.419 | <b>3.56E-05</b> | -0.367 | 0.28  | 1.93E-01        | 1.194  | 0.250 | <b>2.17E-06</b> |
| $\beta_{PT}$<br>[ton·ha <sup>-1</sup> ·day <sup>-1</sup> ·°C <sup>-1</sup> ] | -0.011                                                                                                                                                                                                                           | 0.002 | <b>1.67E-05</b> | -0.008 | 0.00  | <b>4.69E-04</b> | -0.004 | 0.002 | 7.86E-02        |
| $\beta_{T2}$<br>[ton·ha <sup>-1</sup> ·°C <sup>-2</sup> ]                    | -0.060                                                                                                                                                                                                                           | 0.015 | <b>8.25E-05</b> | 0.021  | 0.01  | 6.22E-02        | -0.040 | 0.007 | <b>3.22E-07</b> |
| AIC                                                                          | 1501                                                                                                                                                                                                                             |       |                 | 1576   |       |                 | 1521   |       |                 |
| <i>r2marg</i>                                                                | 0.26                                                                                                                                                                                                                             |       |                 | 0.16   |       |                 | 0.26   |       |                 |
| <i>r2cond</i>                                                                | 0.77                                                                                                                                                                                                                             |       |                 | 0.76   |       |                 | 0.77   |       |                 |
| <b>Used indicators</b>                                                       | (5) DI                                                                                                                                                                                                                           |       |                 |        |       |                 |        |       |                 |
| <b>Model Structure</b>                                                       | $\beta_0 + \beta_t t + \beta_{DI}(DI) + \beta_{DI2}(DI)^2$                                                                                                                                                                       |       |                 |        |       |                 |        |       |                 |
| $\beta_0$ [ton·ha <sup>-1</sup> ]                                            | 2.75                                                                                                                                                                                                                             | 0.23  | <b>7.47E-31</b> | 2.43   | 0.22  | <b>1.46E-26</b> | 2.40   | 0.21  | <b>1.79E-27</b> |
| $\beta_t$ [ton·ha <sup>-1</sup> ·yr <sup>-1</sup> ]                          | 0.02                                                                                                                                                                                                                             | 0.00  | <b>1.93E-08</b> | 0.02   | 0.00  | <b>1.07E-07</b> | 0.02   | 0.00  | <b>1.62E-07</b> |
| $\beta_{DI}$ [ton·ha <sup>-1</sup> ]                                         | -0.13                                                                                                                                                                                                                            | 0.05  | <b>1.19E-02</b> | 0.00   | 0.02  | 9.98E-01        | 0.00   | 0.01  | 8.85E-01        |
| $\beta_{DI2}$ [ton·ha <sup>-1</sup> ]                                        | 0.01                                                                                                                                                                                                                             | 0.00  | 2.19E-01        | 0.00   | 0.00  | 2.25E-01        | 0.00   | 0.00  | 9.31E-01        |
| AIC                                                                          | 1570                                                                                                                                                                                                                             |       |                 | 1580   |       |                 | 1602   |       |                 |
| <i>r2marg</i>                                                                | 0.16                                                                                                                                                                                                                             |       |                 | 0.15   |       |                 | 0.15   |       |                 |
| <i>r2cond</i>                                                                | 0.76                                                                                                                                                                                                                             |       |                 | 0.75   |       |                 | 0.75   |       |                 |
| <b>Used indicators</b>                                                       | (6) Short-term indicators                                                                                                                                                                                                        |       |                 |        |       |                 |        |       |                 |
| <b>Model Structure</b>                                                       | $\beta_0 + \beta_{tt} t + \beta_{NDP1}(NDP1) + \beta_{NDT25}(NDT25) + \beta_{NDP20}(NDP20) + \beta_{Frost}(Frost) + \beta_{NDP1\_2}(NDP1)^2 + \beta_{NDT25\_2}(NDT25)^2 + \beta_{NDP20\_2}(NDP20)^2 + \beta_{Frost\_2}(Frost)^2$ |       |                 |        |       |                 |        |       |                 |
| $\beta_0$ [ton·ha <sup>-1</sup> ]                                            | 1.881                                                                                                                                                                                                                            | 0.263 | <b>1.65E-12</b> | 1.781  | 0.321 | <b>3.59E-08</b> | 2.141  | 0.235 | <b>4.62E-19</b> |
| $\beta_t$ [ton·ha <sup>-1</sup> ·yr <sup>-1</sup> ]                          | 0.021                                                                                                                                                                                                                            | 0.004 | <b>2.90E-08</b> | 0.023  | 0.003 | <b>8.65E-15</b> | 0.023  | 0.003 | <b>6.13E-13</b> |
| $\beta_{NDP20}$ [ton·ha <sup>-1</sup> ·day <sup>-1</sup> ]                   | 0.097                                                                                                                                                                                                                            | 0.055 | 7.72E-02        | 0.011  | 0.033 | 7.45E-01        | -0.009 | 0.037 | 8.17E-01        |
| $\beta_{NDP1}$ [ton·ha <sup>-1</sup> ·day <sup>-1</sup> ]                    | 0.053                                                                                                                                                                                                                            | 0.016 | <b>8.65E-04</b> | 0.040  | 0.014 | <b>3.03E-03</b> | 0.041  | 0.014 | <b>3.25E-03</b> |
| $\beta_{NDT25}$ [ton·ha <sup>-1</sup> ·day <sup>-1</sup> ]                   | 0.014                                                                                                                                                                                                                            | 0.015 | 3.60E-01        | -0.022 | 0.008 | <b>3.76E-03</b> | -0.030 | 0.010 | <b>1.94E-03</b> |
| $\beta_{Frost}$ [ton·ha <sup>-1</sup> ·day <sup>-1</sup> ]                   | 0.024                                                                                                                                                                                                                            | 0.016 | 1.38E-01        | 0.023  | 0.016 | 1.46E-01        | -      | -     | -               |
| $\beta_{NDP20\_2}$ [ton·ha <sup>-1</sup> ·day <sup>-2</sup> ]                | -0.032                                                                                                                                                                                                                           | 0.024 | 1.73E-01        | -0.002 | 0.009 | 7.86E-01        | -0.002 | 0.012 | 8.80E-01        |
| $\beta_{NDP1\_2}$ [ton·ha <sup>-1</sup> ·day <sup>-2</sup> ]                 | -0.001                                                                                                                                                                                                                           | 0.000 | <b>1.49E-04</b> | -0.001 | 0.000 | <b>3.82E-03</b> | -0.001 | 0.000 | <b>6.96E-03</b> |
| $\beta_{NDT25\_2}$ [ton·ha <sup>-1</sup> ·day <sup>-2</sup> ]                | -0.001                                                                                                                                                                                                                           | 0.001 | 2.41E-01        | 0.000  | 0.000 | 4.50E-01        | 0.000  | 0.000 | 6.98E-01        |
| $\beta_{Frost\_2}$ [ton·ha <sup>-1</sup> ·day <sup>-2</sup> ]                | -0.001                                                                                                                                                                                                                           | 0.001 | 3.83E-01        | -0.002 | 0.001 | 2.56E-01        | -      | -     | -               |
| AIC                                                                          | 1630                                                                                                                                                                                                                             |       |                 | 1606   |       |                 | 1569   |       |                 |
| <i>r2marg</i>                                                                | 0.16                                                                                                                                                                                                                             |       |                 | 0.23   |       |                 | 0.23   |       |                 |
| <i>r2cond</i>                                                                | 0.75                                                                                                                                                                                                                             |       |                 | 0.75   |       |                 | 0.76   |       |                 |

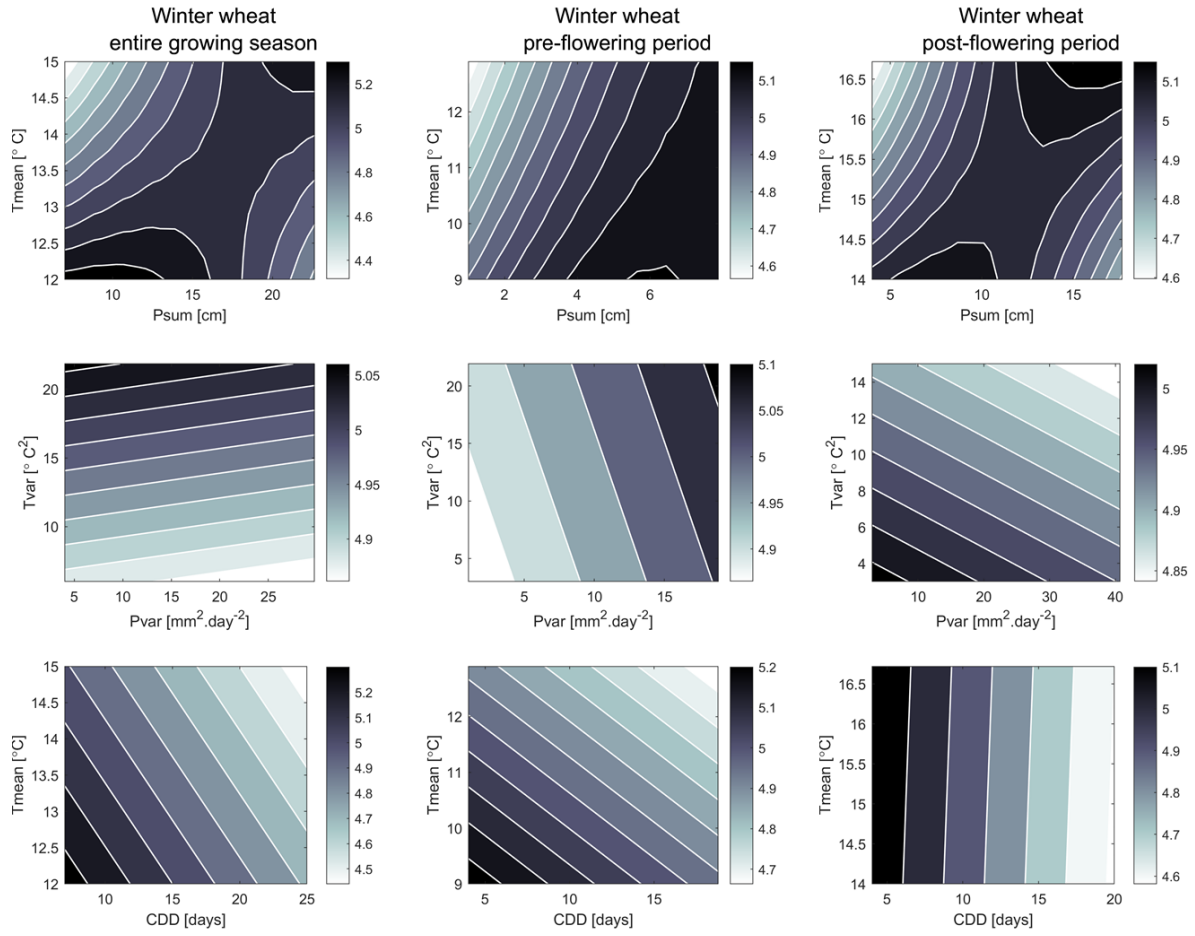

Figure S1 The model representing interacting indicators for winter wheat

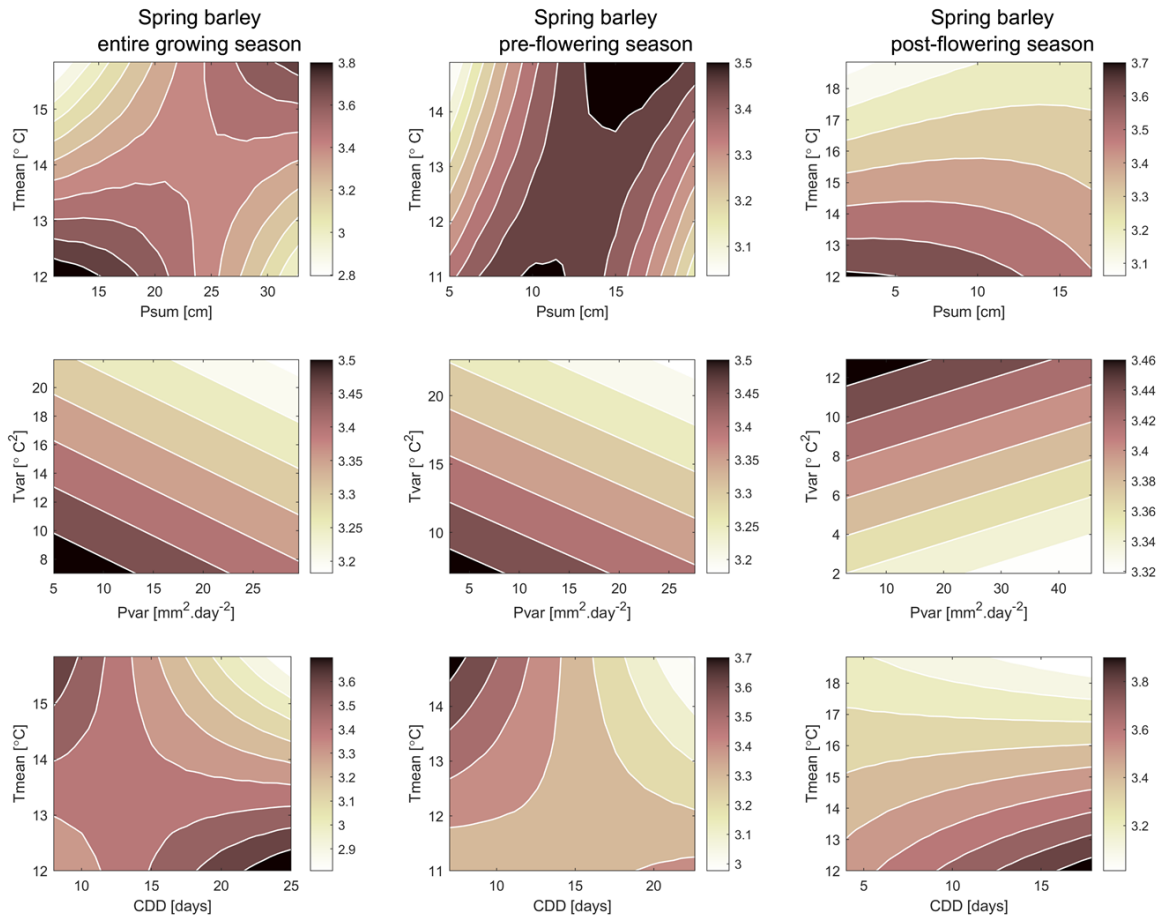

Figure. S2 Same as above but for spring barley

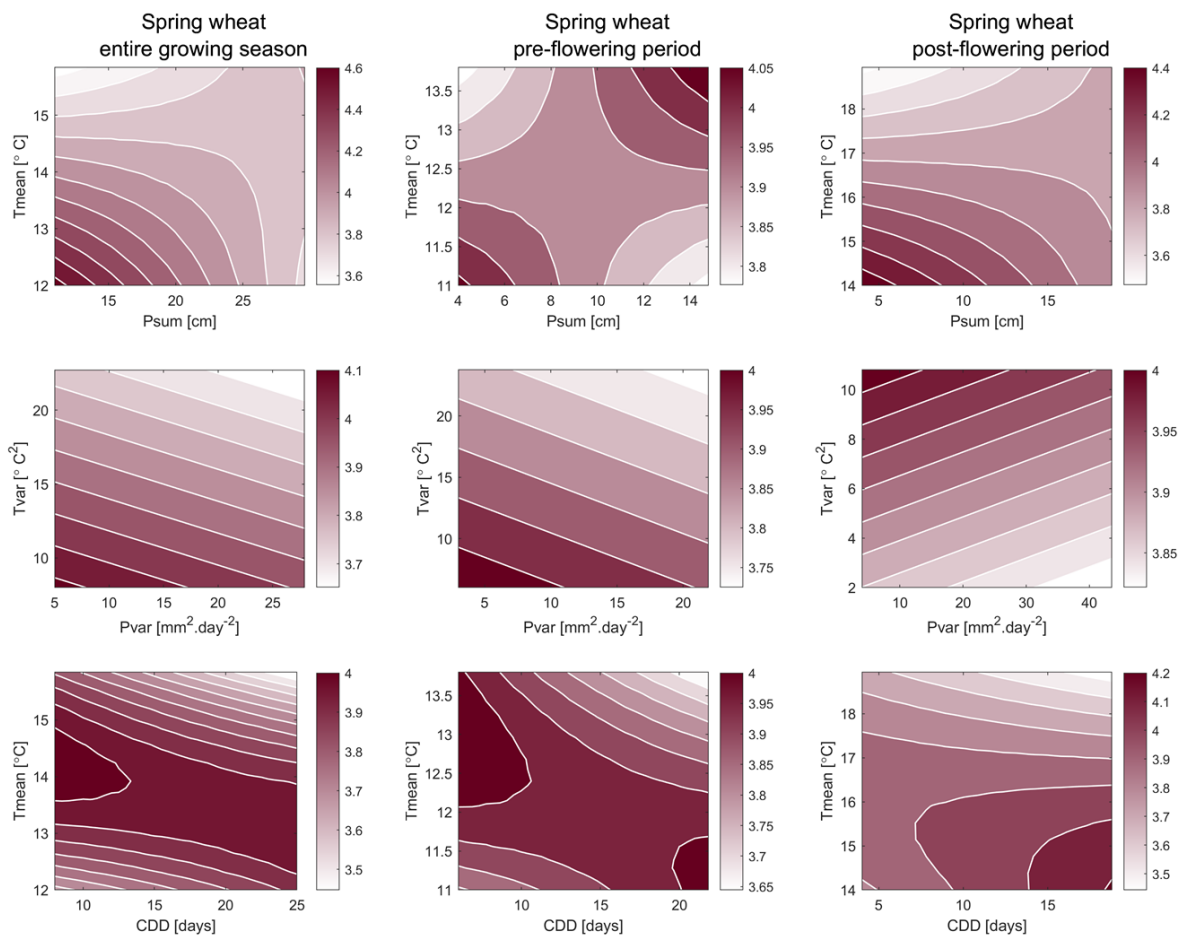

Figure. S3 Same as above but for spring wheat

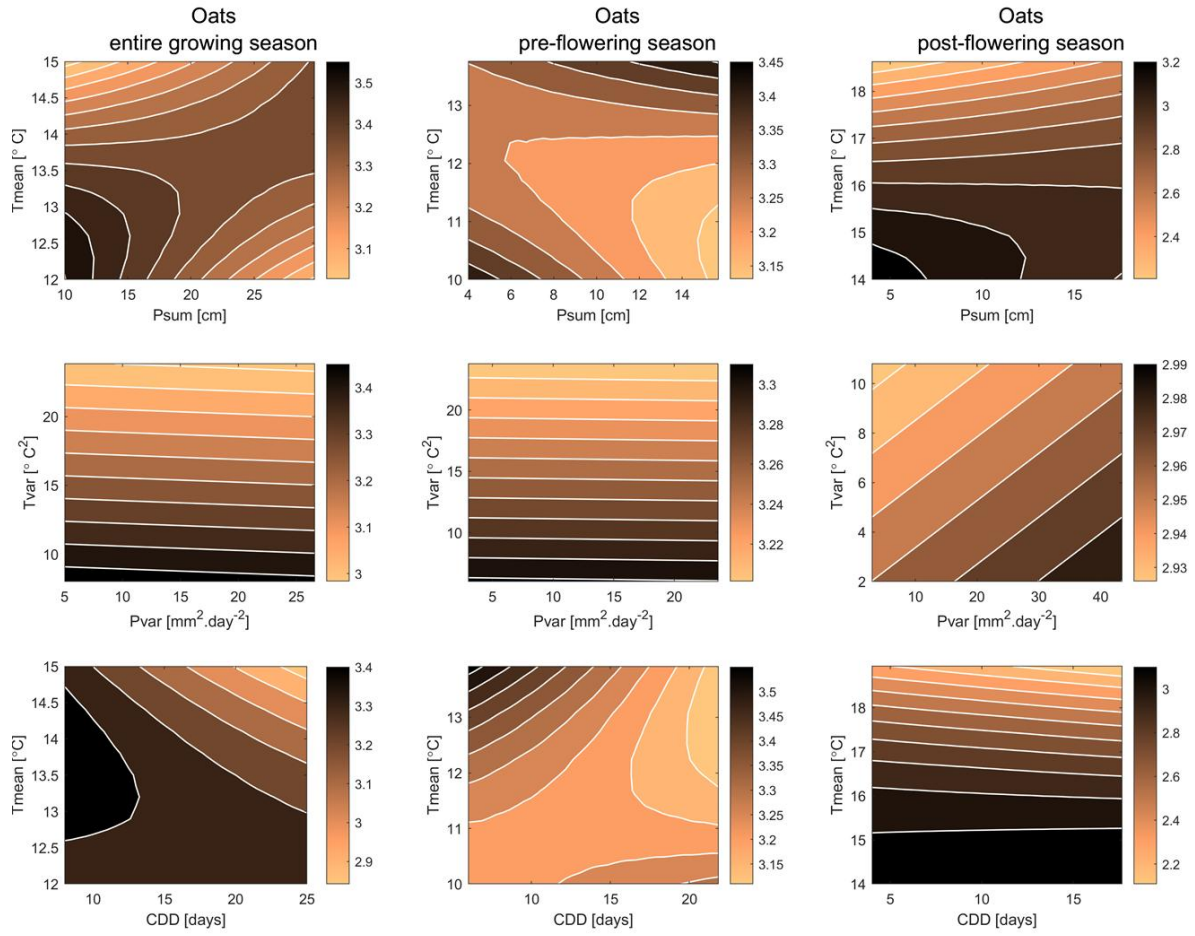

Figure S4 Same as above but for oats
